# Supplementary material for: A Retrospective Review on Severe Malaria in Colombia, 2007–2020
Source: MDPI journal article supplement (doi:10.3390/pathogens11080893), 2022-08-09
Supplement: s1 [file s1]

## Supplementary Materials

**Table S1.** Organ-System affected according age range.

| Code OSC              | AGE RANGE (years) |             |             |            |            |            |             |
|-----------------------|-------------------|-------------|-------------|------------|------------|------------|-------------|
|                       | 1-14              | 15-24       | 25-34       | 35-44      | 45-60      | >60        | Total       |
| 1                     | 1046              | 1017        | 752         | 433        | 344        | 176        | 3768        |
| 2                     | 155               | 190         | 105         | 93         | 63         | 30         | 636         |
| 3                     | 79                | 76          | 57          | 29         | 34         | 19         | 294         |
| 4                     | 47                | 26          | 21          | 22         | 9          | 4          | 129         |
| 5                     | 38                | 33          | 12          | 18         | 11         | 1          | 113         |
| 6                     | 267               | 271         | 164         | 114        | 97         | 52         | 965         |
| 7                     | 102               | 92          | 46          | 46         | 24         | 24         | 334         |
| 8                     | 21                | 30          | 19          | 10         | 6          | 2          | 88          |
| 9                     | 17                | 9           | 5           | 5          | 3          | 2          | 41          |
| 10                    | 7                 | 9           | 3           | 2          | 0          | 1          | 22          |
| 11                    | 67                | 37          | 37          | 14         | 13         | 7          | 175         |
| 12                    | 21                | 26          | 10          | 9          | 10         | 3          | 79          |
| 13                    | 5                 | 4           | 0           | 0          | 1          | 1          | 11          |
| 14                    | 1                 | 3           | 2           | 0          | 1          | 1          | 8           |
| 15                    | 9                 | 8           | 4           | 1          | 6          | 1          | 29          |
| 16                    | 3                 | 1           | 1           | 0          | 1          | 1          | 7           |
| 17                    | 2                 | 3           | 3           | 1          | 0          | 1          | 10          |
| 18                    | 1                 | 5           | 1           | 1          | 3          | 1          | 12          |
| 19                    | 2                 | 5           | 1           | 0          | 1          | 1          | 10          |
| 20                    | 5                 | 1           | 3           | 1          | 1          | 0          | 11          |
| 21                    | 2                 | 0           | 1           | 2          | 0          | 1          | 6           |
| 22                    | 29                | 23          | 19          | 10         | 12         | 7          | 100         |
| 23                    | 2                 | 1           | 1           | 2          | 4          | 0          | 10          |
| 24                    | 1                 | 0           | 1           | 0          | 0          | 0          | 2           |
| 25                    | 0                 | 3           | 1           | 1          | 2          | 2          | 9           |
| 26                    | 0                 | 3           | 2           | 0          | 0          | 0          | 5           |
| 27                    | 5                 | 7           | 4           | 4          | 2          | 1          | 23          |
| <b>Total of cases</b> | <b>1934</b>       | <b>1883</b> | <b>1275</b> | <b>818</b> | <b>648</b> | <b>339</b> | <b>6897</b> |

p(X2)-Pearson)= 0.038.

**Table S2.** Summary of six Colombian studies on severe vivax malaria.

| Author              | Region                                            | Years of carry out the study | D <sup>a</sup> | Number of participants in the study | Complication; (%) <sup>b</sup> |        |         |        |       |       |        |
|---------------------|---------------------------------------------------|------------------------------|----------------|-------------------------------------|--------------------------------|--------|---------|--------|-------|-------|--------|
|                     |                                                   |                              |                |                                     | C1                             | C2     | C3      | C4     | C5    | C6    | C7     |
| Tobón et al 2017    | Turbo, Necoclí, El Bagre, Tumaco, Guapi, Timbiquí | 1997-2007                    | R              | 193                                 | H; 26%                         | A; 10% | T; 8%   | R; 5%  | C; 2% | P; 2% | HG; 1% |
| Chaparro et al 2016 | Colombia                                          | 2007-2013                    | R              | 1126                                | H; 37%                         | R; 26% | P; 15%  | C; 11% |       |       |        |
| O'Brien et al 2014  | Tumaco, Cali, Buenaventura                        | 2009-2013                    | R              | 16                                  | T; 25%                         | A; 22% | HB; 19% |        |       |       |        |
| Tobón et al 2019    | Antioquia (hospitals)                             | 2010-2014                    | R              | 10                                  | H <sup>c</sup>                 | A      | Ac      | T      |       |       |        |

|                            |                           |           |   |     |        |         |          |         |       |       |
|----------------------------|---------------------------|-----------|---|-----|--------|---------|----------|---------|-------|-------|
| Arévalo-Herrera et al 2015 | Tierralta, Quibdó, Tumaco | 2011-2013 | P | 42  | H; 4%  | R; 15%  | HU 20    | P; 6,5% | A; 4% | T; 2% |
| Tovar-Acero et al 2021     | South Córdoba             | 2017-2019 | P | 156 | T; 54% | HG; 48% | H, K;30% |         |       |       |

<sup>a</sup> All designs are descriptive, cross-sectional; four are retrospective (R) and two are prospective (P); <sup>b</sup> Type of severe complication: H hepatic, A anemia, T thrombocytopenia, R renal, C cerebral, P pulmonary, HG hyperglycemia, HB hyperbilirubinemia, Ac acidosis, HU hemoglobinuria; <sup>c</sup> The report does not present a percentage of each complication in SVM. In summary, the most frequent complications are (gross percentages): Hepatic (24%); Thrombocytopenia (22%); Renal (19%); Anemia (12%); Pulmonary (8%); Cerebral (7%).
